# Supplementary material for: Preliminary analysis of in utero low-level arsenic exposure and fetal growth using biometric measurements extracted from fetal ultrasound reports
Source: PubMed Central journal article supplement (PMC4429981; doi:10.1186/1476-069x-14-12), 2015-03-30

Supplemental Material, Figure S1.

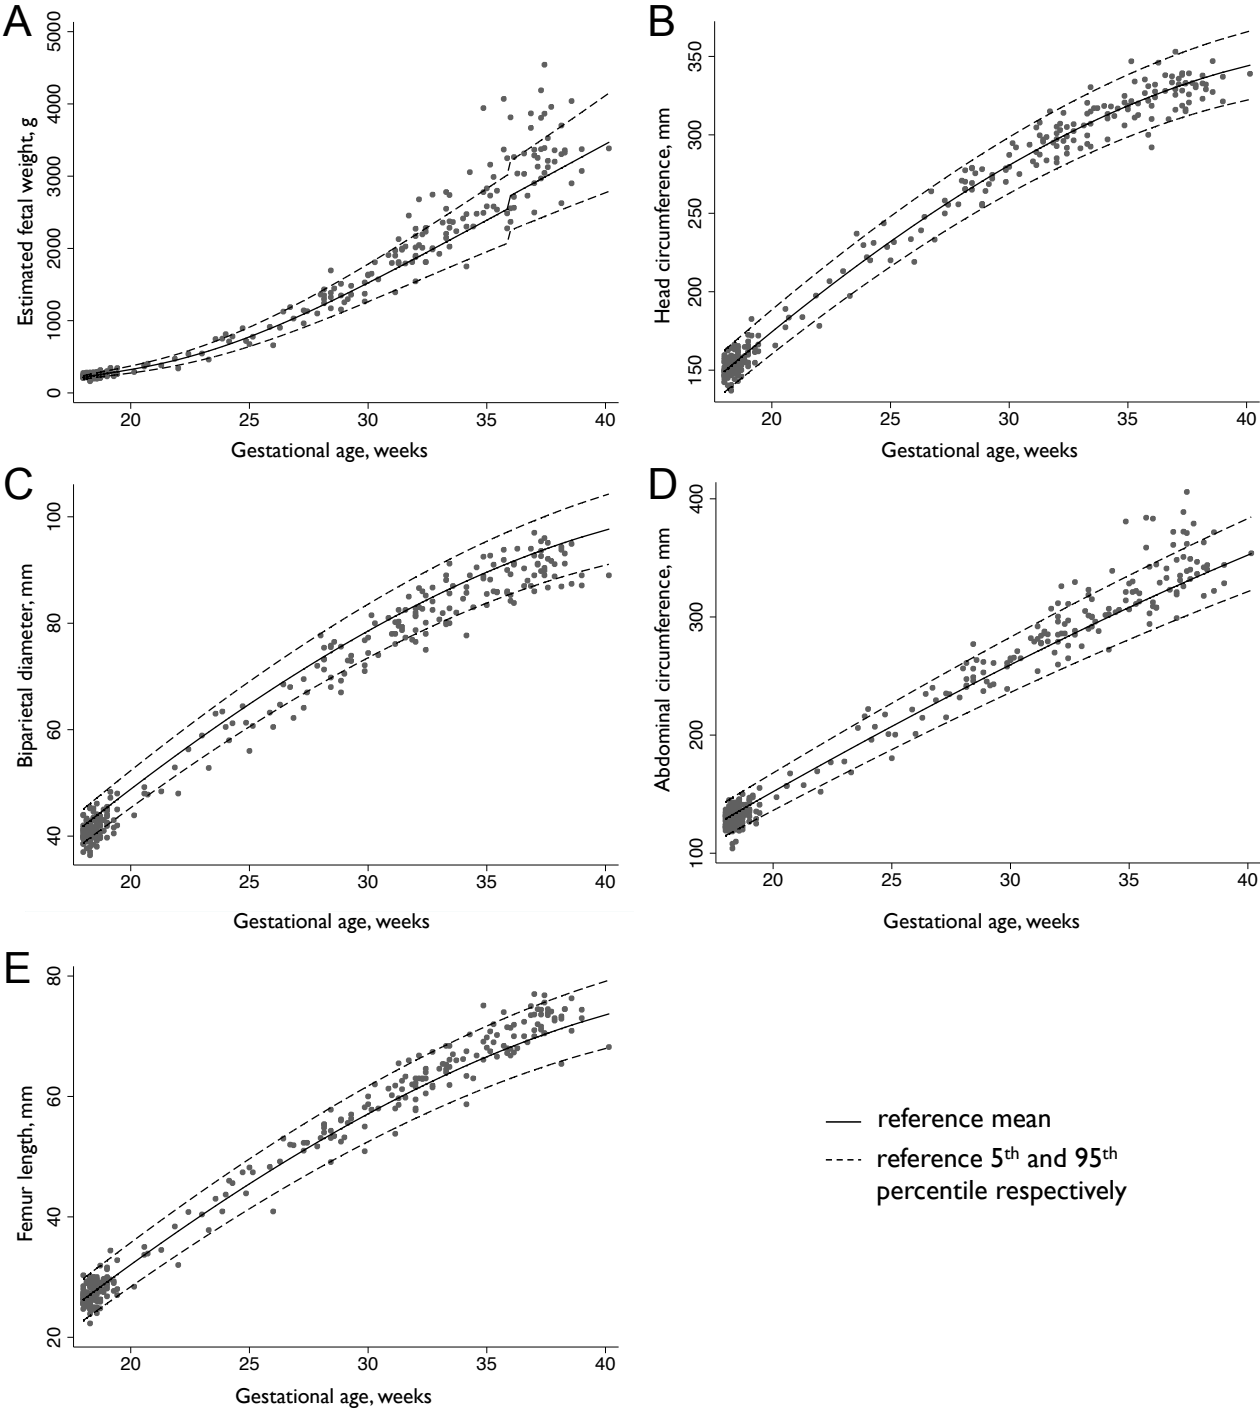

Supplement: 12940_2014_850_MOESM1_ESM.pdf [file 12940_2014_850_MOESM1_ESM.pdf]
